# Supplementary material for: Does intermittent nutrition enterally normalise hormonal and metabolic responses to feeding in critically ill adults? A protocol for the DINE-Normal proof-of-concept randomised parallel-group study
Source: PubMed Central journal article supplement — BMJ Open. 2024 Nov 24;14(11):e086540. doi: 10.1136/bmjopen-2024-086540 (PMC11590799; doi:10.1136/bmjopen-2024-086540), 2024-11-24
Supplement: bmjopen-14-11-s002.pdf [file bmjopen-14-11-s002.pdf]

# Intensive Care Unit Nutrition Guideline

This guideline is a quick reference guide to feeding patients on ICU at North Bristol NHS Trust.

Version 1.1

Valid from 01/03/2022

Review due 01/03/2024

Authors: Stephen Taylor, Rowan  
Clemente

## Introduction

This guideline applies to all patients admitted to Southmead ICU. Follow the enteral feeding process diagram on page 2 for all patients.

## Aims and rationale

### Days 1-2

Support physiological adaptation to critical illness by:

- Correcting micronutrient deficit to optimise metabolic and anti-oxidant systems.
- Provide minimal EN macronutrients to maintain GI function and immunity.

### Days 3-6

Hypocaloric, high nitrogen feeding:

- Energy expenditure: Provide <60% if obese, <80% if other to avoid substrate intolerance
- Nitrogen: 0.2-0.32g/kg/day to optimise wound healing and acute-phase protein response.

### Day 7 onwards

Meet full requirement.

- Energy: Dietitian judges when to meet energy expenditure as substrate tolerance permits.
- Nitrogen and bolus feed/ food: Time to optimise activity-induced anabolism.

## Enteral feeding decision tree

Following admission to ICU, the flow chart on the next page should be followed for all patients (excluding PACE admissions).

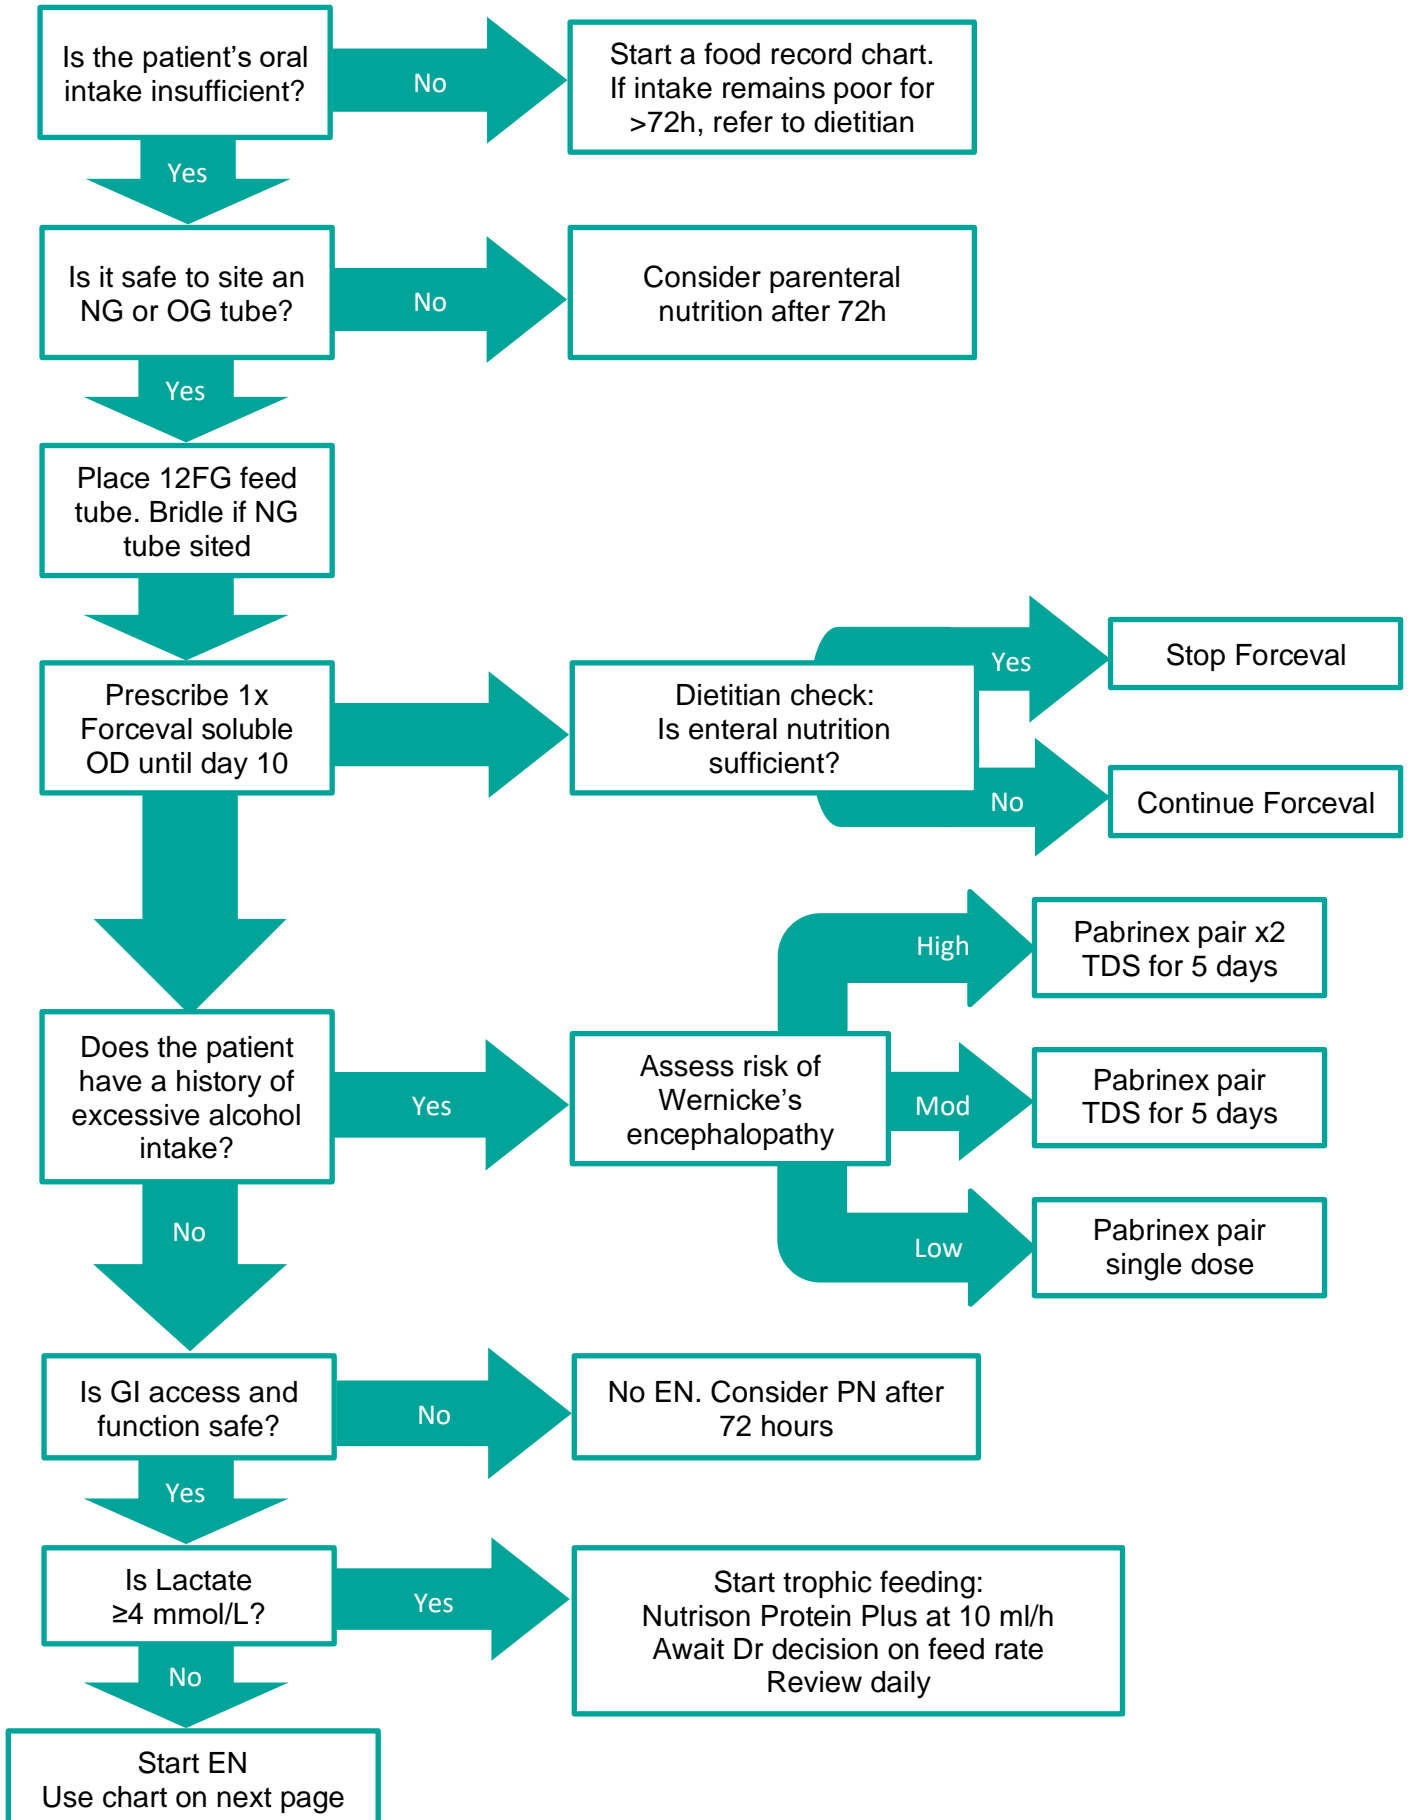

## Nutrition action plan

The following decision tool is designed to summarise responsibilities of nursing and medical staff following admission along with providing an aide-memoire for enteral feeding rates and phosphate replacement.

|                                     | Screen                                        | Action                                          | Daily WR review                                                                                                                                                                                                                                                                               |                       |          |          |     |                 |       |       |      |          |        |        |         |                       |
|-------------------------------------|-----------------------------------------------|-------------------------------------------------|-----------------------------------------------------------------------------------------------------------------------------------------------------------------------------------------------------------------------------------------------------------------------------------------------|-----------------------|----------|----------|-----|-----------------|-------|-------|------|----------|--------|--------|---------|-----------------------|
| ADMISSION                           | Nurse                                         | <b>Insufficient food</b>                        | Place 12F NGT if necessary and possible                                                                                                                                                                                                                                                       | Confirm tube position |          |          |     |                 |       |       |      |          |        |        |         |                       |
|                                     |                                               | <b>NGT in situ</b>                              | Bridle, ensure clip 0.5cm from septum                                                                                                                                                                                                                                                         |                       |          |          |     |                 |       |       |      |          |        |        |         |                       |
|                                     | Doctor                                        | <b>All patients</b>                             | Forceval soluble 1 tablet OD NG until day 10                                                                                                                                                                                                                                                  | Dietitian may cancel  |          |          |     |                 |       |       |      |          |        |        |         |                       |
|                                     |                                               | <b>Wernicke's risk</b>                          | <table border="1"> <thead> <tr> <th></th> <th>High</th> <th>Possible</th> <th>Low</th> </tr> </thead> <tbody> <tr> <td>Pabrinex 1 pair</td> <td>2 TDS</td> <td>1 TDS</td> <td>1 OD</td> </tr> <tr> <td>Duration</td> <td>5 days</td> <td>5 days</td> <td>One off</td> </tr> </tbody> </table> |                       | High     | Possible | Low | Pabrinex 1 pair | 2 TDS | 1 TDS | 1 OD | Duration | 5 days | 5 days | One off | Symptom > dose review |
|                                     |                                               |                                                 |                                                                                                                                                                                                                                                                                               | High                  | Possible | Low      |     |                 |       |       |      |          |        |        |         |                       |
|                                     |                                               | Pabrinex 1 pair                                 | 2 TDS                                                                                                                                                                                                                                                                                         | 1 TDS                 | 1 OD     |          |     |                 |       |       |      |          |        |        |         |                       |
| Duration                            | 5 days                                        | 5 days                                          | One off                                                                                                                                                                                                                                                                                       |                       |          |          |     |                 |       |       |      |          |        |        |         |                       |
| <b>Burn, CRRT</b>                   | 1 pair Pabrinex IV OD & 10mL Additracce IV OD | Dietitian will review                           |                                                                                                                                                                                                                                                                                               |                       |          |          |     |                 |       |       |      |          |        |        |         |                       |
| <b>No GI access / poor function</b> | No enteral nutrition                          | <b>Consider</b> TPN after 72h                   |                                                                                                                                                                                                                                                                                               |                       |          |          |     |                 |       |       |      |          |        |        |         |                       |
|                                     | <b>Lactate &gt; 4.0</b>                       | 10ml/h Nutrison Protein Plus until WR decision. | Feed rate decision                                                                                                                                                                                                                                                                            |                       |          |          |     |                 |       |       |      |          |        |        |         |                       |

|       | Nurse                           | Start NG feed (ml/hr)                                     | Most patients                                              |              |                                                    | Check gastric residual volume 4 hourly              |                                                         |
|-------|---------------------------------|-----------------------------------------------------------|------------------------------------------------------------|--------------|----------------------------------------------------|-----------------------------------------------------|---------------------------------------------------------|
|       |                                 |                                                           | Nutrison                                                   | Protein Plus | Fluid restricted or K+ >5.0 & no CRRT Concentrated |                                                     |                                                         |
| DAILY | Nurse                           | Day 1 & 2                                                 | 30                                                         |              | 20                                                 | < 250mL bile/feed:<br>→ Return + full feed rate     |                                                         |
|       |                                 | Then: full feed                                           | Dietitian regime or use actual weight (kg)                 |              |                                                    |                                                     |                                                         |
|       |                                 | 40kg                                                      | 40                                                         |              | 27                                                 | ↓                                                   |                                                         |
|       |                                 | 50kg                                                      | 45                                                         |              | 30                                                 | ≥ 250mL or blood / faecal / vomit                   |                                                         |
|       |                                 | 60kg                                                      | 50                                                         |              | 32                                                 | → Discard + full feed rate                          |                                                         |
|       |                                 | 70kg +                                                    | 55                                                         |              | 35                                                 | ↓                                                   |                                                         |
|       | Doctor                          | <b>Phosphate</b>                                          | IV polyfusor                                               | ml           | ml/hr                                              | Hours                                               | If 2nd > 250mL or vomit<br>→ Metoclopramide 10mg IV TDS |
|       |                                 | < 0.5 *                                                   |                                                            | 400          | 33                                                 | 12                                                  | ↓                                                       |
|       |                                 | < 0.65 *                                                  |                                                            | 300          | 25                                                 | 12                                                  | 24h: unresolved or ≤ full rate EN?                      |
|       |                                 |                                                           | * If <72h of feed > ↓ feed to 30ml/h until phosphate > 1.0 |              |                                                    |                                                     | ↓                                                       |
|       | <0.8                            |                                                           | 200                                                        | 17           | 12                                                 | Request NJ via dieticians                           |                                                         |
|       | 0.8-1.0 or if previous day <0.8 | Phosphate sandoz                                          | 1 tablet TDS                                               |              |                                                    | If > 24h delay for NJ:<br>Erythromycin 250mg IV QDS |                                                         |
|       | <b>CRRT</b>                     | <b>Adjust daily supplement to maintain PO4 at 1.0-1.4</b> |                                                            |              |                                                    |                                                     |                                                         |
|       | <b>New infusion</b>             | <b>Recheck phosphate level before commencing</b>          |                                                            |              |                                                    |                                                     |                                                         |
|       |                                 |                                                           |                                                            |              |                                                    | Version 2.0, December 19                            |                                                         |

## Management of gastric aspirates

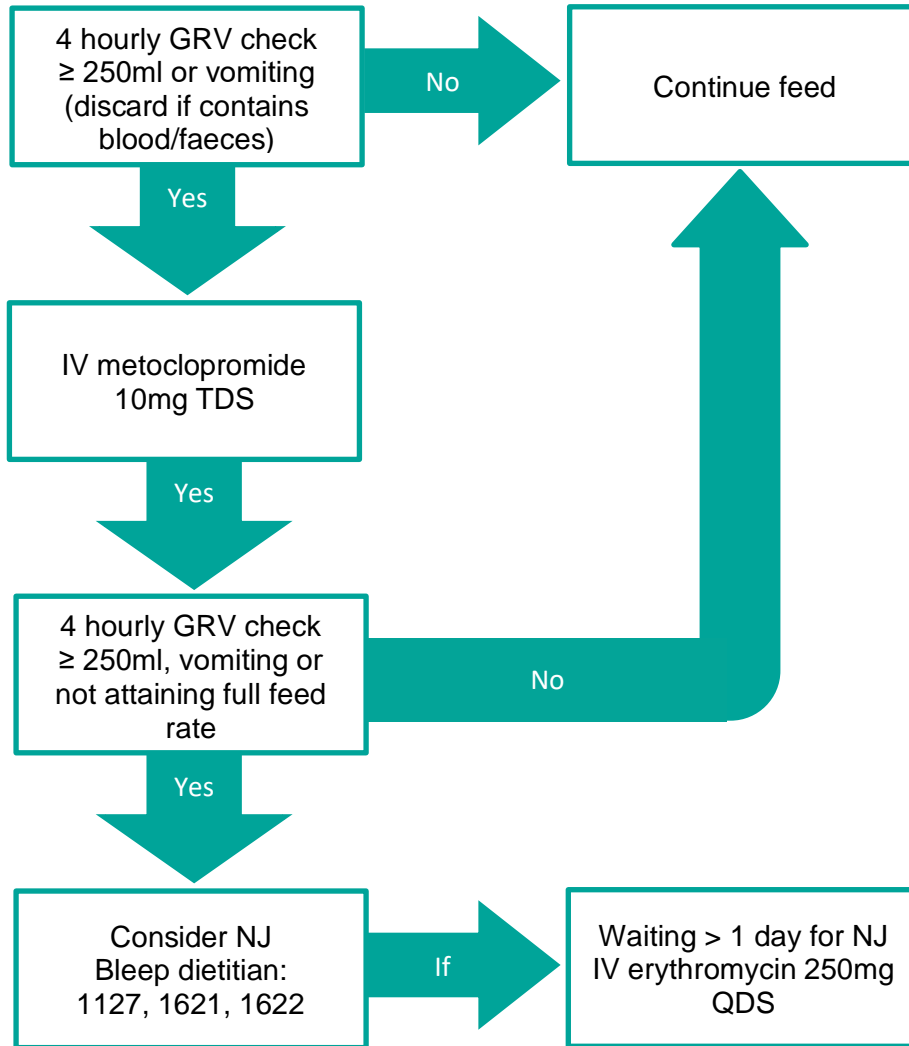

## Total Parenteral Nutrition (TPN)

### In hours

If the multidisciplinary team have made the clinical decision that TPN is required, bleep your Pod dietitian.

### Out of hours

If the multidisciplinary team have made the clinical decision that TPN is required over the weekend:

- Complete the TPN calculator (intranet) to determine safest infusion rate

| Responsibility       | Name           | Division / Specialty | Job Title |
|----------------------|----------------|----------------------|-----------|
| <b>Authorised by</b> | <b>ICU SDM</b> | Intensive Care Unit  | -         |
| <b>Author</b>        | Stephen Taylor | Intensive Care Unit  | Dietitian |
| <b>Author</b>        | Rowan Clemente | Intensive Care Unit  | Dietitian |

Approved / Owned by ICU SDM

This document can only be guaranteed to be the current adopted version if opened directly from the NBT intranet.
