# Supplementary material for: Does intermittent nutrition enterally normalise hormonal and metabolic responses to feeding in critically ill adults? A protocol for the DINE-Normal proof-of-concept randomised parallel-group study
Source: PubMed Central journal article supplement — BMJ Open. 2024 Nov 24;14(11):e086540. doi: 10.1136/bmjopen-2024-086540 (PMC11590799; doi:10.1136/bmjopen-2024-086540), 2024-11-24
Supplement: bmjopen-14-11-s003.pdf [file bmjopen-14-11-s003.pdf]

### APPENDIX 3 - Schedule of Assessments

| Assessment             | Measurement                                                                                                                                                                                                                                                           | Timepoint(s) of evaluation                                     |
|------------------------|-----------------------------------------------------------------------------------------------------------------------------------------------------------------------------------------------------------------------------------------------------------------------|----------------------------------------------------------------|
| Hormonal and metabolic | Insulin, C-peptide, fatty acid, glycerol, triglyceride, GLP-1, glucose, ketones urea                                                                                                                                                                                  | Tested hourly on Study Day 2 as per research bloods (Figure 2) |
| Acid-base balance      | Arterial blood gas (pH, bicarbonate, lactate, base excess)                                                                                                                                                                                                            | With routine daily blood sampling                              |
| Haematology            | Haematocrit, haemoglobin, platelet count, red cell distribution width, red blood cell count, white blood cell count, neutrophils, lymphocytes.<br>Activated partial thromboplastin time, prothrombin time, International Normalised Ratio (INR)<br>C-reactive protein | With routine daily blood sampling                              |
| Biochemistry           | Albumin, alkaline phosphatase, alanine aminotransferase, calcium, creatinine, magnesium, phosphate, potassium, sodium, total bilirubin, urea, eGFR                                                                                                                    | With routine daily blood sampling                              |
| Clinical               | SOFA<br>Mortality and length of stay                                                                                                                                                                                                                                  | Baseline, day 2 ICU and hospital discharge                     |
| Nutrition              | Vomiting<br>Diarrhoea<br>Delayed gastric emptying<br>Ileus<br>Aspiration<br>Total enteral nutritional intake                                                                                                                                                          | During study intervention period                               |
