# Supplementary material for: Does intermittent nutrition enterally normalise hormonal and metabolic responses to feeding in critically ill adults? A protocol for the DINE-Normal proof-of-concept randomised parallel-group study
Source: HighWire-hosted journal article supplement (doi:10.1136/bmjopen-2024-086540), 2024-11-01
Supplement: bmjopen-2024-086540supp006_data_supplement.pdf [file bmjopen-2024-086540supp006_data_supplement.pdf]

The DINE-Normal proof-of-concept study

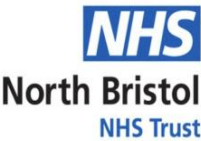

Does Intermittent **N**utrition **E**nterally **N**ormalise hormonal and metabolic responses to feeding in critically ill adults? The DINE-Normal proof-of-concept randomised parallel group study.

Consent form for participants who regain capacity

Study Number .....328469.....  
Participant Identification Number .....  
Name of Researcher .....

Please initial box:

1. I confirm that I have read the information sheet dated... (version...) for the above study. I have had the opportunity to consider the information, ask questions and have had these answered satisfactorily.

☐
2. I understand that I have already been enrolled in the study but I am free to withdraw from the study at any time without giving any reason, without my medical care or legal rights being affected.

☐
3. I understand that relevant sections of my medical notes and data that has been collected during the study may be reviewed by individuals from the research team, North Bristol NHS Trust, or from regulatory authorities, where it is relevant to my participation in this research. I give permission for these individuals to have access to the relevant parts of my medical records.

☐
4. I understand that the information collected about me will be used to support other research in the future and may be shared anonymously with other researchers.

☐
5. I agree to take part in the above study.

☐

|                               |           |      |
|-------------------------------|-----------|------|
| Name of participant           | Signature | Date |
| Name of person taking consent | Signature | Date |

When completed: 1 for participant; 1 for researcher site file; 1 (original) to be kept in medical notes.
